# Supplementary material for: Unveiling the adsorption mechanism of zeolitic imidazolate framework-8 with high efficiency for removal of copper ions from aqueous solutions
Source: Royal Society of Chemistry journal article supplement (doi:10.1039/c6dt01827k), 2016-01-01
Supplement: c6dt01827k1.pdf [file c6dt01827k1.pdf]

Electronic Supplementary Material

**Unveiling the adsorption mechanism of zeolitic imidazolate framework-8 with high removal efficiency on copper ions from aqueous solutions**

Yujie Zhang,<sup>a,†</sup> Zhiqiang Xie,<sup>b,†</sup> Zhuqing Wang,<sup>a,c</sup> Xuhui Feng,<sup>d</sup> Ying Wang,<sup>b,\*</sup> Aiguo Wu<sup>a,\*</sup>

<sup>a</sup> Key Laboratory of Magnetic Materials and Devices & Key Laboratory of Additive Manufacturing Materials of Zhejiang Province & Division of Functional Materials and Nanodevices, Ningbo Institute of Materials Technology and Engineering, Chinese Academy of Sciences, Ningbo 315201, China.

<sup>b</sup> Department of Mechanical & Industrial Engineering, Louisiana State University, Baton Rouge, LA 70803, USA.

<sup>c</sup> Department of Chemistry, Anqing Normal College, Anqing, China.

<sup>d</sup> Department of Chemical & Biological Engineering, Colorado School of Mines, Golden, Colorado 80401, USA.

\*Corresponding author. Tel.: +86-574-86685039, Fax: +86-574-86685163, E-mail: aiguo@nimte.ac.cn, ywang@lsu.edu.

† These authors contributed equally to this work.

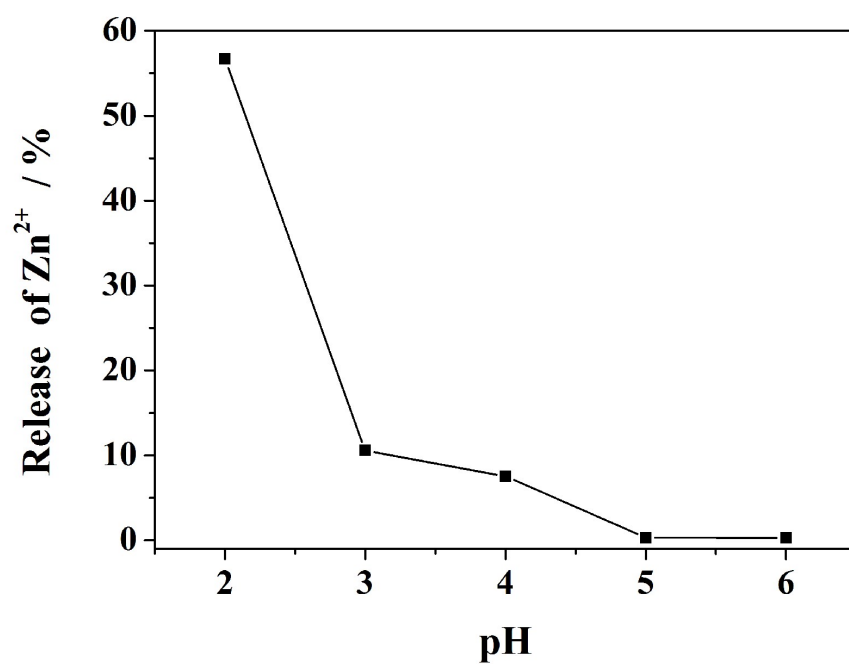

**Fig. S1** The stability of ZIF-8 in the aqueous solutions with the pH values ranging from 2 to 6.

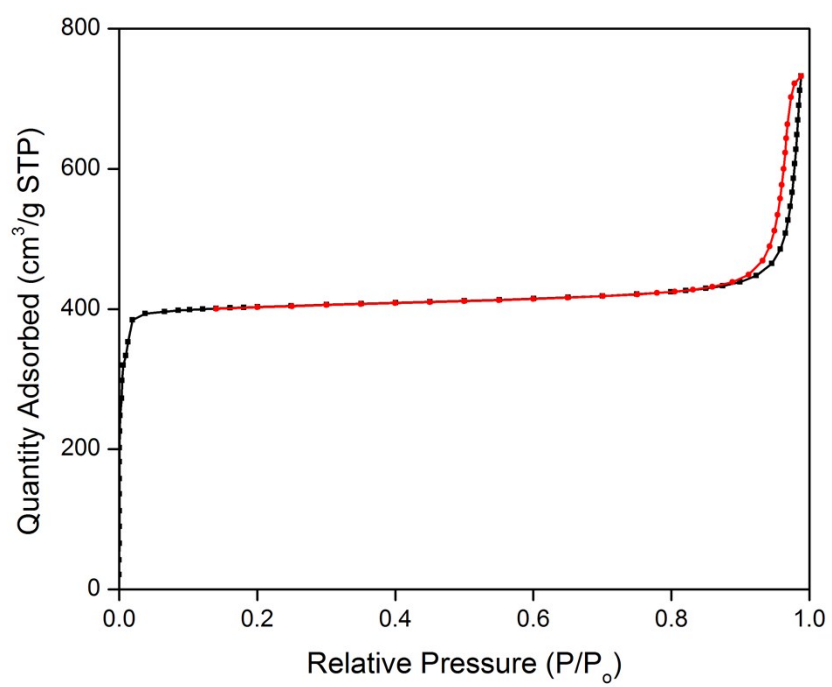

**Fig. S2** N<sub>2</sub> adsorption-desorption isotherms of ZIF-8.

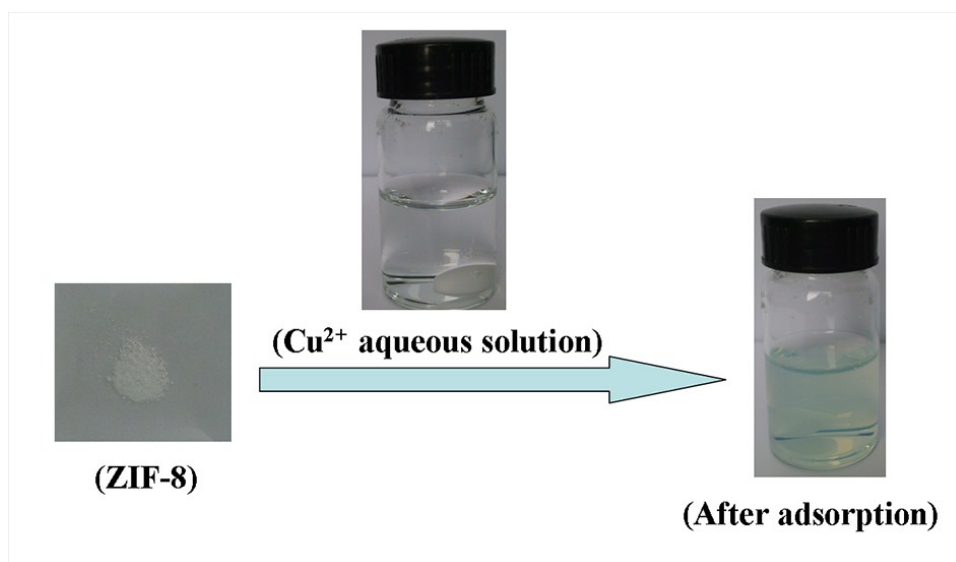

**Fig. S3** Color change in the process of  $\text{Cu}^{2+}$  adsorption.

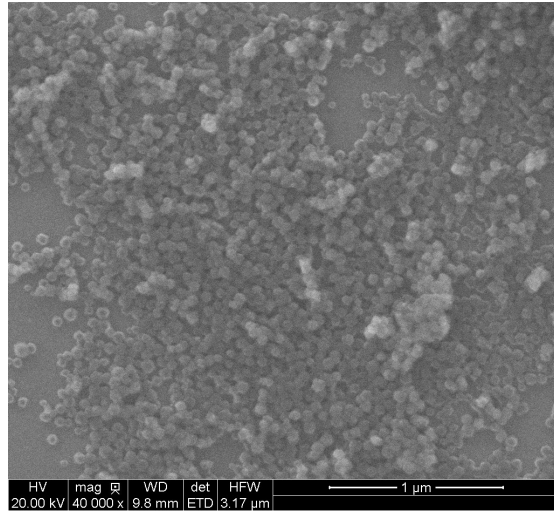

**Fig. S4** Typical SEM image of ZIF-8 nanoparticles.
